# Supplementary material
Source: MDPI journal article supplement (https://www.mdpi.com/2075-4701/14/5/500)
Supplement: s1 [file s1 › metals-2942615-supplementary.pdf]

## Supplementary file

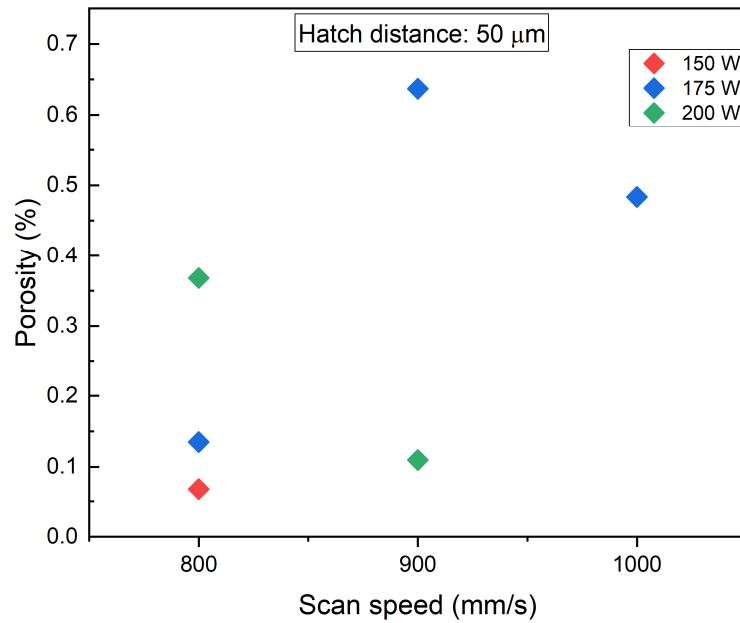

Figure S1: Porosity percentage plotted against Scan speed for various laser powers printed with a hatch distance of 50  $\mu\text{m}$  and layer thickness of 30  $\mu\text{m}$  for C2 alloy

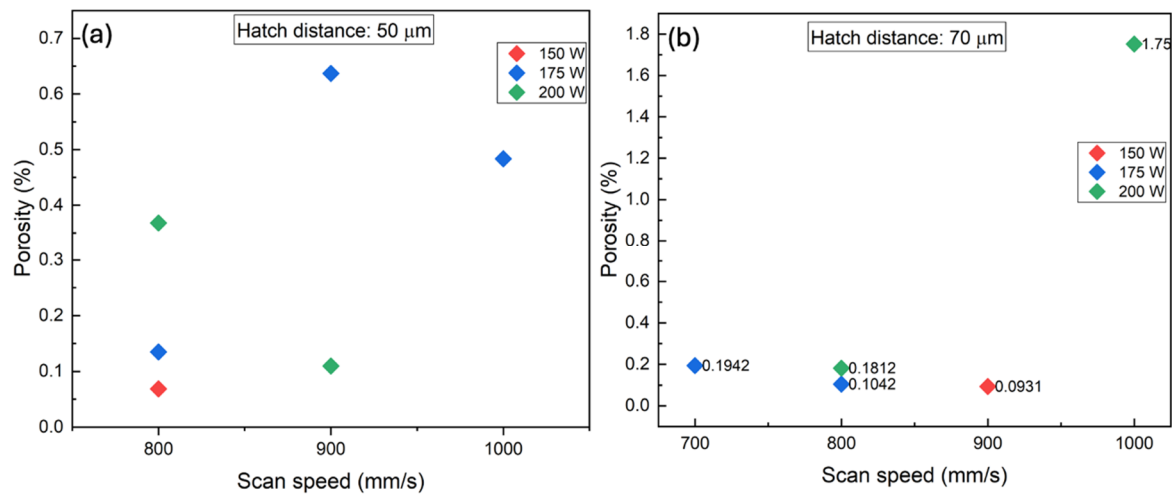

Figure S2: Porosity percentage plotted against Scan speed for various laser powers printed with a hatch distance of (a) 50  $\mu\text{m}$  and (b) 70  $\mu\text{m}$  and layer thickness of 30  $\mu\text{m}$  for C1 alloy

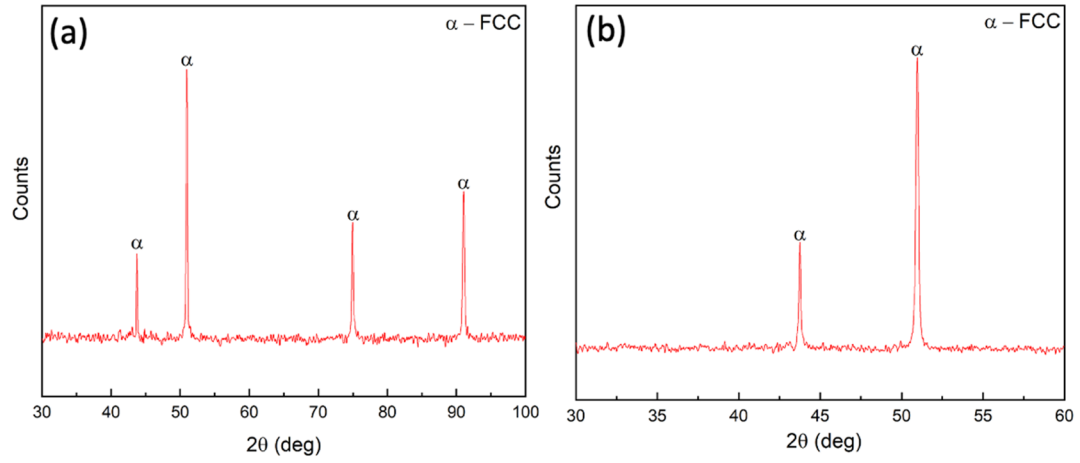

Figure S3 : XRD plot of C2 alloy after tensile testing at 900°C at a step size of (a) 0.0262° and (b) 0.0131°
